# Supplementary material for: A native IgE in complex with profilin provides insights into allergen recognition and cross-reactivity
Source: PubMed Central journal article supplement (PMC9334453; doi:10.1038/s42003-022-03718-w), 2022-07-27
Supplement: 42003_2022_3718_MOESM2_ESM.pdf [file 42003_2022_3718_MOESM2_ESM.pdf]

## Description of Additional Supplementary Files

**File name:** Supplementary Data 1

**Description:** Excell Table of the Hev b 8 – Fab/IgE 2F5 interactions.
