# Supplementary material for: A native IgE in complex with profilin provides insights into allergen recognition and cross-reactivity
Source: PubMed Central journal article supplement (PMC9334453; doi:10.1038/s42003-022-03718-w), 2022-07-27
Supplement: 42003_2022_3718_MOESM3_ESM.pdf [file 42003_2022_3718_MOESM3_ESM.pdf]

## Supplementary Data 1. rHev b 8 – Fab/IgE 2F5 interactions

| Hydrophobic Interactions within 5 Angstroms |     |     |          |     |
|---------------------------------------------|-----|-----|----------|-----|
| Fab/IgE 2F5                                 |     |     | rHev b 8 |     |
| CDR-L1                                      | 32  | Tyr | 122      | Leu |
|                                             | 32  | Tyr | 125      | Tyr |
| FWR-L2                                      | 49  | Tyr | 1        | Met |
| CDR-L3                                      | 91  | Phe | 125      | Tyr |
|                                             | 92  | Trp | 117      | Met |
|                                             | 92  | Trp | 118      | Ile |
|                                             | 92  | Trp | 15       | Ile |
| CDR-H3                                      | 102 | Val | 125      | Tyr |

| π- π Interactions within 4.5 and 7 Å |    |     |          |     |           |
|--------------------------------------|----|-----|----------|-----|-----------|
| Fab/IgE 2F5                          |    |     | rHev b 8 |     | Dist. [Å] |
| CDR-L1                               | 32 | Tyr | 125      | Tyr | 5.3       |

| Cation-Pi Interactions within 6 Å |    |     |          |     |           |
|-----------------------------------|----|-----|----------|-----|-----------|
| Fab/IgE 2F5                       |    |     | rHev b 8 |     | Dist. [Å] |
| CDR-L1                            | 32 | Tyr | 121      | Arg | 5.21      |
| CDR-L3                            | 96 | Tyr | 121      | Arg | 5.87      |

| Salt Bridges |     |     |          |     |     |           |      |
|--------------|-----|-----|----------|-----|-----|-----------|------|
| Fab/IgE 2F5  |     |     | rHev b 8 |     |     | Dist. [Å] |      |
| CDR-H2       | NH2 | Arg | 50       | OD2 | Asp | 128       | 3.35 |
|              | NH2 | Arg | 52       | OD1 | Asp | 124       | 2.88 |
|              | NE  | Arg | 52       | OD1 | Asp | 128       | 2.98 |

| Main Chain – Main Chain Hydrogen Bonds |    |     |          |     |     |           |      |
|----------------------------------------|----|-----|----------|-----|-----|-----------|------|
| Fab/IgE 2F5                            |    |     | rHev b 8 |     |     | Dist. [Å] |      |
| CDR-H1                                 | 33 | Ala | N        | 128 | Asp | O         | 3.28 |
|                                        | 31 | Thr | O        | 130 | Gly | N         | 3.02 |

| Main Chain - Side Chain Hydrogen Bonds |     |     |          |     |     |           |      |
|----------------------------------------|-----|-----|----------|-----|-----|-----------|------|
| Fab/IgE 2F5                            |     |     | rHev b 8 |     |     | Dist. [Å] |      |
| CDR-H3                                 | 101 | His | NE2      | 125 | Tyr | O         | 3.44 |
| CDR-L1                                 | 28  | Asn | ND2      | 14  | Glu | O         | 3.28 |
|                                        | 28  | Asn | ND2      | 14  | Glu | O         | 3.28 |
|                                        | 30  | His | ND1      | 14  | Glu | O         | 3.44 |
|                                        | 32  | Tyr | OH       | 122 | Leu | N         | 3.36 |
| FWR-L2                                 | 49  | Tyr | OH       | 1   | Met | N         | 3.45 |

|        |    |     |   |     |     |     |      |
|--------|----|-----|---|-----|-----|-----|------|
| CDR-L3 | 91 | Phe | O | 121 | Arg | NE  | 2.99 |
|        | 91 | Phe | O | 121 | Arg | NH2 | 2.71 |
|        | 91 | Phe | O | 121 | Arg | NH2 | 2.71 |
|        | 92 | Trp | O | 121 | Arg | NE  | 2.99 |

| Side Chain - Side Chain Hydrogen Bonds |     |     |     |          |     |     |           |
|----------------------------------------|-----|-----|-----|----------|-----|-----|-----------|
| Fab/IgE 2F5                            |     |     |     | rHev b 8 |     |     | Dist. [Å] |
| CDR-H2                                 | 50  | Arg | NH2 | 128      | Asp | OD2 | 3.35      |
|                                        | 50  | Arg | NH2 | 128      | Asp | OD2 | 3.35      |
|                                        | 52  | Arg | NH2 | 124      | Asp | OD1 | 2.88      |
|                                        | 52  | Arg | NH2 | 124      | Asp | OD1 | 2.88      |
|                                        | 52  | Arg | NE  | 128      | Asp | OD1 | 2.98      |
|                                        | 52  | Arg | NE  | 128      | Asp | OD2 | 3.34      |
|                                        | 55  | Thr | OG1 | 98       | Asn | OD1 | 2.77      |
|                                        | 55  | Thr | OG1 | 98       | Asn | OD1 | 2.77      |
|                                        | 55  | Thr | OG1 | 98       | Asn | OD1 | 2.77      |
| CDR-H3                                 | 101 | His | NE2 | 129      | Gln | NE2 | 3.32      |
|                                        | 101 | His | NE2 | 129      | Gln | NE2 | 3.32      |
|                                        | 101 | His | NE2 | 129      | Gln | NE2 | 3.32      |
| CDR-L2                                 | 30  | His | ND1 | 13       | Cys | SG  | 3.61      |
|                                        | 30  | His | ND1 | 13       | Cys | SG  | 3.61      |
|                                        | 32  | Tyr | OH  | 10       | His | ND1 | 3.45      |
|                                        | 32  | Tyr | OH  | 10       | His | ND1 | 3.45      |
| FWR-L2                                 | 49  | Tyr | OH  | -2       | Asp | OD1 | 3.4       |
|                                        | 49  | Tyr | OH  | -2       | Asp | OD2 | 2.85      |
| CDR-L2                                 | 50  | Asn | ND2 | 1        | Met | SD  | 3.09      |
|                                        | 50  | Asn | ND2 | 1        | Met | SD  | 3.09      |
|                                        | 50  | Asn | OD1 | 125      | Tyr | OH  | 3.22      |
|                                        | 50  | Asn | OD1 | 125      | Tyr | OH  | 3.22      |
|                                        | 50  | Asn | OD1 | 125      | Tyr | OH  | 3.22      |
| CDR-L3                                 | 96  | Tyr | OH  | 121      | Arg | NH2 | 3.45      |
|                                        | 96  | Tyr | OH  | 121      | Arg | NH2 | 3.45      |

| Non bonded contacts |    |     |    |          |     |     |           |
|---------------------|----|-----|----|----------|-----|-----|-----------|
| Fab/IgE 2F5         |    |     |    | rHev b 8 |     |     | Dist. [Å] |
|                     | O  | Thr | 31 | O        | Ile | 127 | 3.75      |
|                     | O  | Thr | 31 | C        | Asp | 128 | 3.74      |
|                     | O  | Thr | 31 | O        | Asp | 128 | 3.51      |
|                     | O  | Thr | 31 | C        | Gln | 129 | 3.33      |
|                     | O  | Thr | 31 | O        | Gln | 129 | 3.78      |
|                     | O  | Thr | 31 | N        | Gly | 130 | 3.02      |
|                     | O  | Thr | 31 | CA       | Gly | 130 | 3.45      |
|                     | CA | Tyr | 32 | O        | Asp | 128 | 3.27      |

|        |        |     |     |     |     |     |      |
|--------|--------|-----|-----|-----|-----|-----|------|
| CDR-H1 | C      | Tyr | 32  | O   | Asp | 128 | 3.78 |
|        | CG     | Tyr | 32  | O   | Asp | 128 | 3.87 |
|        | CD2    | Tyr | 32  | O   | Asp | 128 | 3.46 |
|        | CE1    | Tyr | 32  | O   | Gln | 129 | 3.67 |
|        | CE2    | Tyr | 32  | CA  | Gln | 129 | 3.73 |
|        | CE2    | Tyr | 32  | O   | Gln | 129 | 3.74 |
|        | CZ     | Tyr | 32  | O   | Gln | 129 | 3.4  |
|        | OH     | Tyr | 32  | O   | Gln | 129 | 3.59 |
|        | N      | Ala | 33  | O   | Asp | 128 | 3.28 |
|        | CB     | Ala | 33  | CB  | Asp | 128 | 3.79 |
|        | CB     | Ala | 33  | CG  | Asp | 128 | 3.76 |
|        | CDR-H2 | NH2 | Arg | 50  | OD2 | Asp | 128  |
| CD     |        | Arg | 52  | OD1 | Asp | 128 | 3.7  |
| CD     |        | Arg | 52  | OD2 | Asp | 128 | 3.53 |
| NE     |        | Arg | 52  | CG  | Asp | 128 | 3.55 |
| NE     |        | Arg | 52  | OD1 | Asp | 128 | 2.98 |
| NE     |        | Arg | 52  | OD2 | Asp | 128 | 3.34 |
| CZ     |        | Arg | 52  | OD1 | Asp | 128 | 3.83 |
| NH2    |        | Arg | 52  | CB  | Asp | 124 | 3.51 |
| NH2    |        | Arg | 52  | CG  | Asp | 124 | 3.27 |
| NH2    |        | Arg | 52  | OD1 | Asp | 124 | 2.88 |
| NH2    |        | Arg | 52  | OD1 | Asp | 128 | 3.88 |
| CB     |        | Thr | 55  | OD1 | Asn | 98  | 3.53 |
| OG1    |        | Thr | 55  | CG  | Asn | 98  | 3.83 |
| OG1    |        | Thr | 55  | OD1 | Asn | 98  | 2.77 |
| CG2    |        | Thr | 55  | OD1 | Asn | 98  | 3.4  |
| OD1    |        | Asn | 56  | CG2 | Ile | 127 | 3.54 |
| OD1    |        | Asn | 56  | CD1 | Ile | 127 | 3.84 |
| CDR-H3 |        | ND1 | His | 101 | O   | Asp | 128  |
|        | ND1    | His | 101 | CB  | Asp | 128 | 3.38 |
|        | CD2    | His | 101 | CG  | Gln | 129 | 3.58 |
|        | CD2    | His | 101 | NE2 | Gln | 129 | 3.59 |
|        | CE1    | His | 101 | O   | Tyr | 125 | 3.2  |
|        | CE1    | His | 101 | CD1 | Tyr | 125 | 3.9  |
|        | CE1    | His | 101 | CB  | Asp | 128 | 3.44 |
|        | NE2    | His | 101 | O   | Tyr | 125 | 3.44 |
|        | NE2    | His | 101 | CD1 | Tyr | 125 | 3.69 |
|        | NE2    | His | 101 | CE1 | Tyr | 125 | 3.42 |
|        | NE2    | His | 101 | CZ  | Tyr | 125 | 3.62 |
|        | NE2    | His | 101 | CG  | Gln | 129 | 3.42 |
|        | NE2    | His | 101 | CD  | Gln | 129 | 3.88 |
|        | NE2    | His | 101 | NE2 | Gln | 129 | 3.32 |
|        | CG1    | Val | 102 | CE1 | Tyr | 125 | 3.42 |

|        |     |     |     |     |     |      |      |
|--------|-----|-----|-----|-----|-----|------|------|
|        | CG1 | Val | 102 | OH  | Tyr | 125  | 3.67 |
| CDR-L1 | ND2 | Asn | 28  | O   | Glu | 14   | 3.28 |
|        | O   | His | 30  | O   | Asp | 9    | 3.71 |
|        | O   | His | 30  | ND1 | His | 10   | 3.59 |
|        | O   | His | 30  | CE1 | His | 10   | 3.85 |
|        | ND1 | His | 30  | SG  | Cys | 13   | 3.61 |
|        | ND1 | His | 30  | O   | Glu | 14   | 3.44 |
|        | CE1 | His | 30  | O   | Glu | 14   | 3.13 |
|        | CE1 | His | 30  | CA  | Ile | 15   | 3.79 |
|        | CE1 | His | 30  | CB  | Ile | 15   | 3.62 |
|        | CE1 | His | 30  | CG1 | Ile | 15   | 3.79 |
|        | NE2 | His | 30  | CG1 | Ile | 15   | 3.74 |
|        | NE2 | His | 30  | CD1 | Ile | 15   | 3.86 |
|        | C   | Asn | 31  | CE1 | His | 10   | 3.88 |
|        | O   | Asn | 31  | CE1 | His | 10   | 3.45 |
|        | O   | Asn | 31  | NE2 | His | 10   | 3.83 |
|        | CB  | Asn | 31  | O   | Asp | 9    | 3.84 |
|        | ND2 | Asn | 31  | CB  | Asp | 9    | 3.85 |
|        | CD1 | Tyr | 32  | ND1 | His | 10   | 3.81 |
|        | CD2 | Tyr | 32  | ND1 | His | 10   | 3.74 |
|        | CE1 | Tyr | 32  | ND1 | His | 10   | 3.36 |
|        | CE1 | Tyr | 32  | CE1 | His | 10   | 3.85 |
|        | CE1 | Tyr | 32  | CG  | Tyr | 125  | 3.82 |
|        | CE1 | Tyr | 32  | CD1 | Tyr | 125  | 3.84 |
|        | CE2 | Tyr | 32  | ND1 | His | 10   | 3.28 |
|        | CZ  | Tyr | 32  | ND1 | His | 10   | 3.07 |
|        | CZ  | Tyr | 32  | CG  | Arg | 121  | 3.85 |
|        | OH  | Tyr | 32  | CB  | His | 10   | 3.75 |
|        | OH  | Tyr | 32  | ND1 | His | 10   | 3.45 |
|        | OH  | Tyr | 32  | CG  | Arg | 121  | 3.83 |
|        | OH  | Tyr | 32  | N   | Leu | 122  | 3.36 |
|        | OH  | Tyr | 32  | CA  | Leu | 122  | 3.33 |
|        | OH  | Tyr | 32  | CB  | Leu | 122  | 3.45 |
| OH     | Tyr | 32  | CD1 | Leu | 122 | 3.49 |      |
| FWR-L2 | CZ  | Tyr | 49  | OD2 | Asp | -2   | 3.84 |
|        | OH  | Tyr | 49  | CG  | Asp | -2   | 3.48 |
|        | OH  | Tyr | 49  | OD1 | Asp | -2   | 3.4  |
|        | OH  | Tyr | 49  | OD2 | Asp | -2   | 2.85 |
|        | OH  | Tyr | 49  | CA  | Lys | 0    | 3.86 |
|        | OH  | Tyr | 49  | C   | Lys | 0    | 3.66 |
|        | OH  | Tyr | 49  | CB  | Lys | 0    | 3.2  |
|        | OH  | Tyr | 49  | N   | Met | 1    | 3.45 |
|        | OH  | Tyr | 49  | CB  | Met | 1    | 3.65 |

|        |     |     |    |     |     |     |      |
|--------|-----|-----|----|-----|-----|-----|------|
| CDR-L2 | CG  | Asn | 50 | OH  | Tyr | 125 | 3.87 |
|        | OD1 | Asn | 50 | CZ  | Tyr | 125 | 3.88 |
|        | OD1 | Asn | 50 | OH  | Tyr | 125 | 3.22 |
|        | ND2 | Asn | 50 | SD  | Met | 1   | 3.09 |
|        | ND2 | Asn | 50 | CE  | Met | 1   | 3.8  |
|        | ND2 | Asn | 50 | CE1 | Tyr | 6   | 3.81 |
|        | ND2 | Asn | 50 | OH  | Tyr | 6   | 3.79 |
|        | ND2 | Asn | 50 | OH  | Tyr | 125 | 3.86 |
| CDR-L3 | C   | Phe | 91 | NH2 | Arg | 121 | 3.89 |
|        | O   | Phe | 91 | NE  | Arg | 121 | 2.99 |
|        | O   | Phe | 91 | CZ  | Arg | 121 | 3.28 |
|        | O   | Phe | 91 | NH2 | Arg | 121 | 2.71 |
|        | C   | Trp | 92 | NE  | Arg | 121 | 3.83 |
|        | O   | Trp | 92 | CD  | Arg | 121 | 3.14 |
|        | O   | Trp | 92 | NE  | Arg | 121 | 2.99 |
|        | CE3 | Trp | 92 | CG  | Arg | 121 | 3.73 |
|        | CZ3 | Trp | 92 | CB  | Arg | 121 | 3.79 |
|        | CZ3 | Trp | 92 | CG  | Arg | 121 | 3.63 |
|        | OH  | Tyr | 96 | CZ  | Arg | 121 | 3.87 |
|        | OH  | Tyr | 96 | NH2 | Arg | 121 | 3.45 |
